# Supplementary material
Source: PubMed Central journal article supplement (PMC5841873)
Supplement: jciinsight-2-94275-s001.pdf [file jciinsight-2-94275-s001.pdf]

A

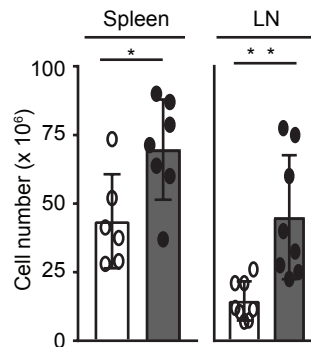

B

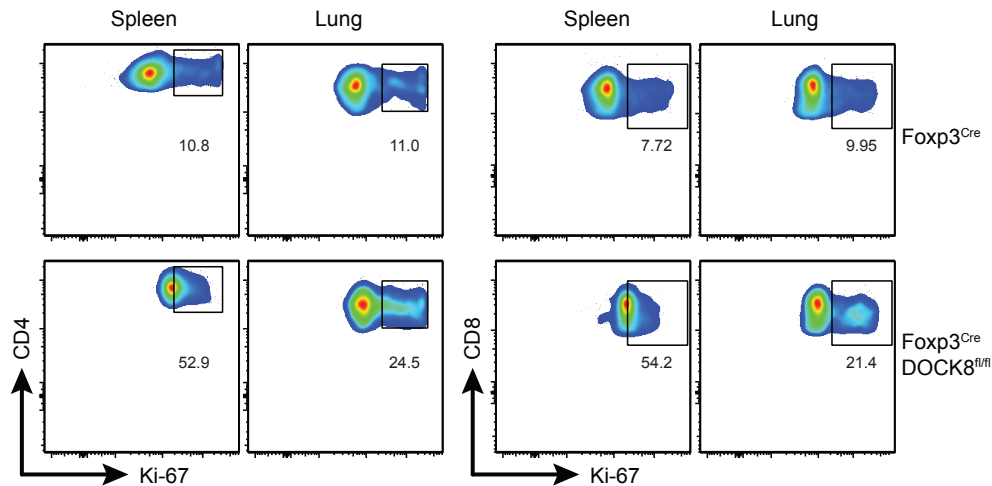

**Figure S1. T<sub>reg</sub> cell-specific deletion of DOCK8 causes T cells expansion, related to Figure 1.**

**(A)** Graph showing the absolute number of lymphocytes in spleen and LN of Foxp3<sup>Cre</sup> and Foxp3<sup>Cre</sup> DOCK8<sup>fl/fl</sup> mice. Three independent experiments were performed with three or more mice per group. **(B)** Representative FACS plot showing that Foxp3<sup>Cre</sup> DOCK8<sup>fl/fl</sup> mice have massive T cells proliferation marked by Ki-67 staining in spleen and lung in comparisons to Foxp3<sup>Cre</sup> mice. Two independent experiments were performed with three mice per group. The data shown are the mean + SD. \*p < 0.05, \*\*\*p < 0.001.

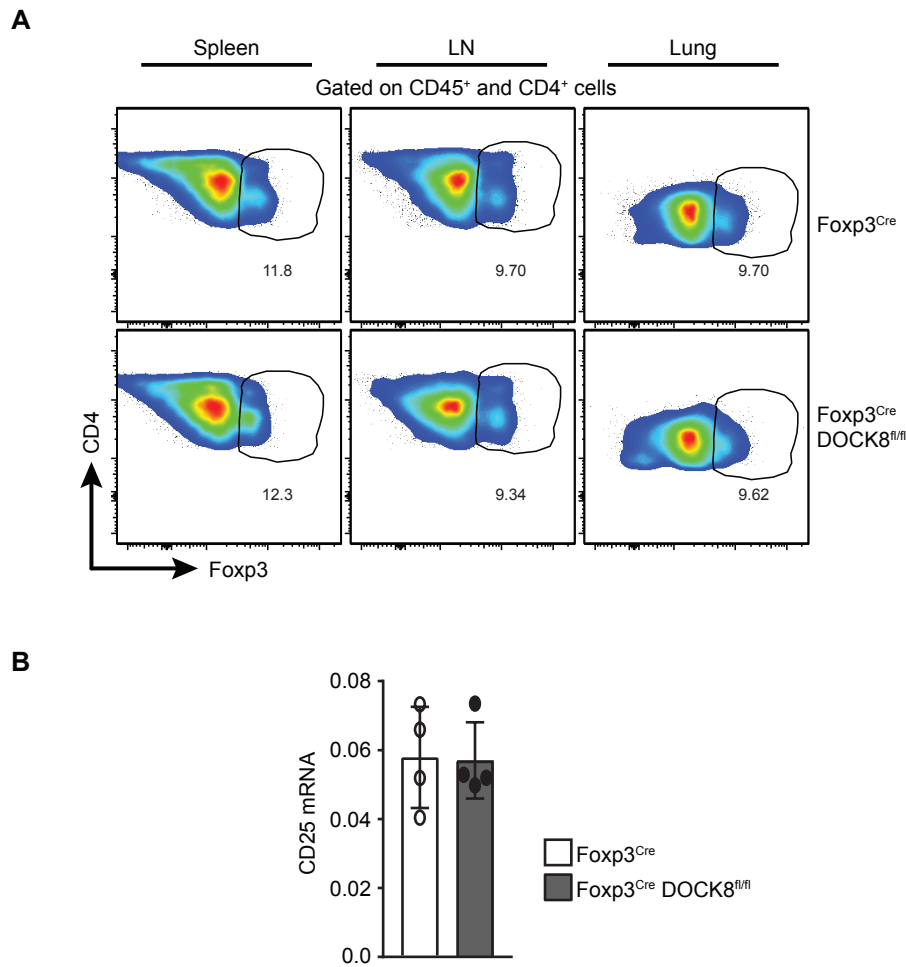

**Figure S2. DOCK8 deficiency does not impact the development of T<sub>reg</sub> cells and CD25 transcript level, related to Figure 3.**

**(A)** CD4<sup>+</sup> Foxp3<sup>+</sup> T cells were analyzed in the spleen, LN and lung, isolated from eight week old Foxp3<sup>Cre</sup> and Foxp3<sup>Cre</sup> DOCK8<sup>fl/fl</sup> mice. Four independent experiments were performed with two or more mice per group. **(B)** DOCK8 does not directly control CD25 transcript. Histogram showing that control and DOCK8-deficient T<sub>reg</sub> cells have comparable CD25 transcript levels. YFP<sup>+</sup> Treg cells were FACS sorted from the spleen and LNs of Foxp3<sup>Cre</sup> and Foxp3<sup>Cre</sup> DOCK8<sup>fl/fl</sup> mice. Total RNA was extracted from purified cells with RNeasy kit from (Qiagen) and reverse transcribed with the iScript cDNA synthesis kit (BioRad). The Q-PCR was conducted using mouse CD25 specific primers (forward 5-CGTTGCTTAGGAACTCCTGGA-3 and reverse 5 -GCTTTCTCGATTTGTCATGGG-3). Gene expression was normalized to the housekeeping gene RPL-19. Two independent experiments were performed with a pooled samples from three to five mice per group.

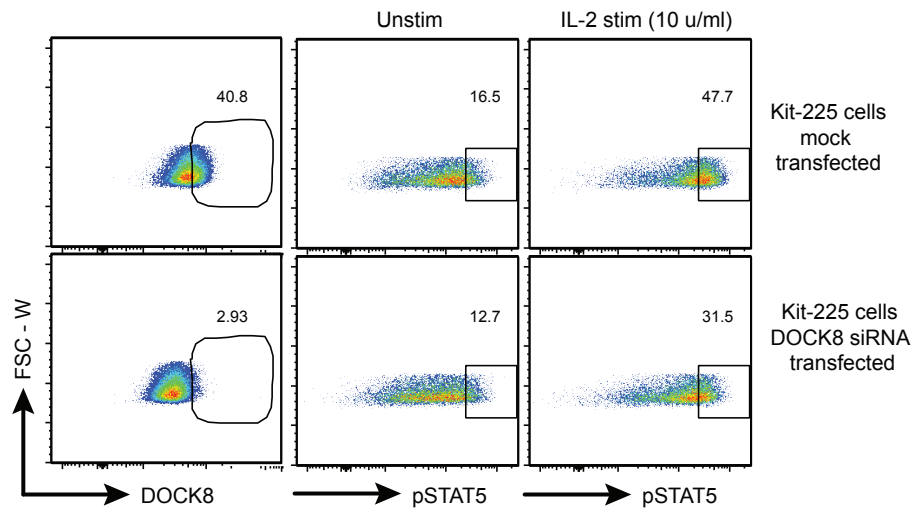

**Figure S3. Kit-225 cells require DOCK8 for optimal STAT5 activation, related to Figure 5.**

Control or siRNA-mediated DOCK8 knock down Kit-225 cells were stimulated with indicated concentration of IL-2 for 15 minutes and then cells were analyzed for pSTAT5 by flow cytometry. Two independent experiments were performed in triplicate.

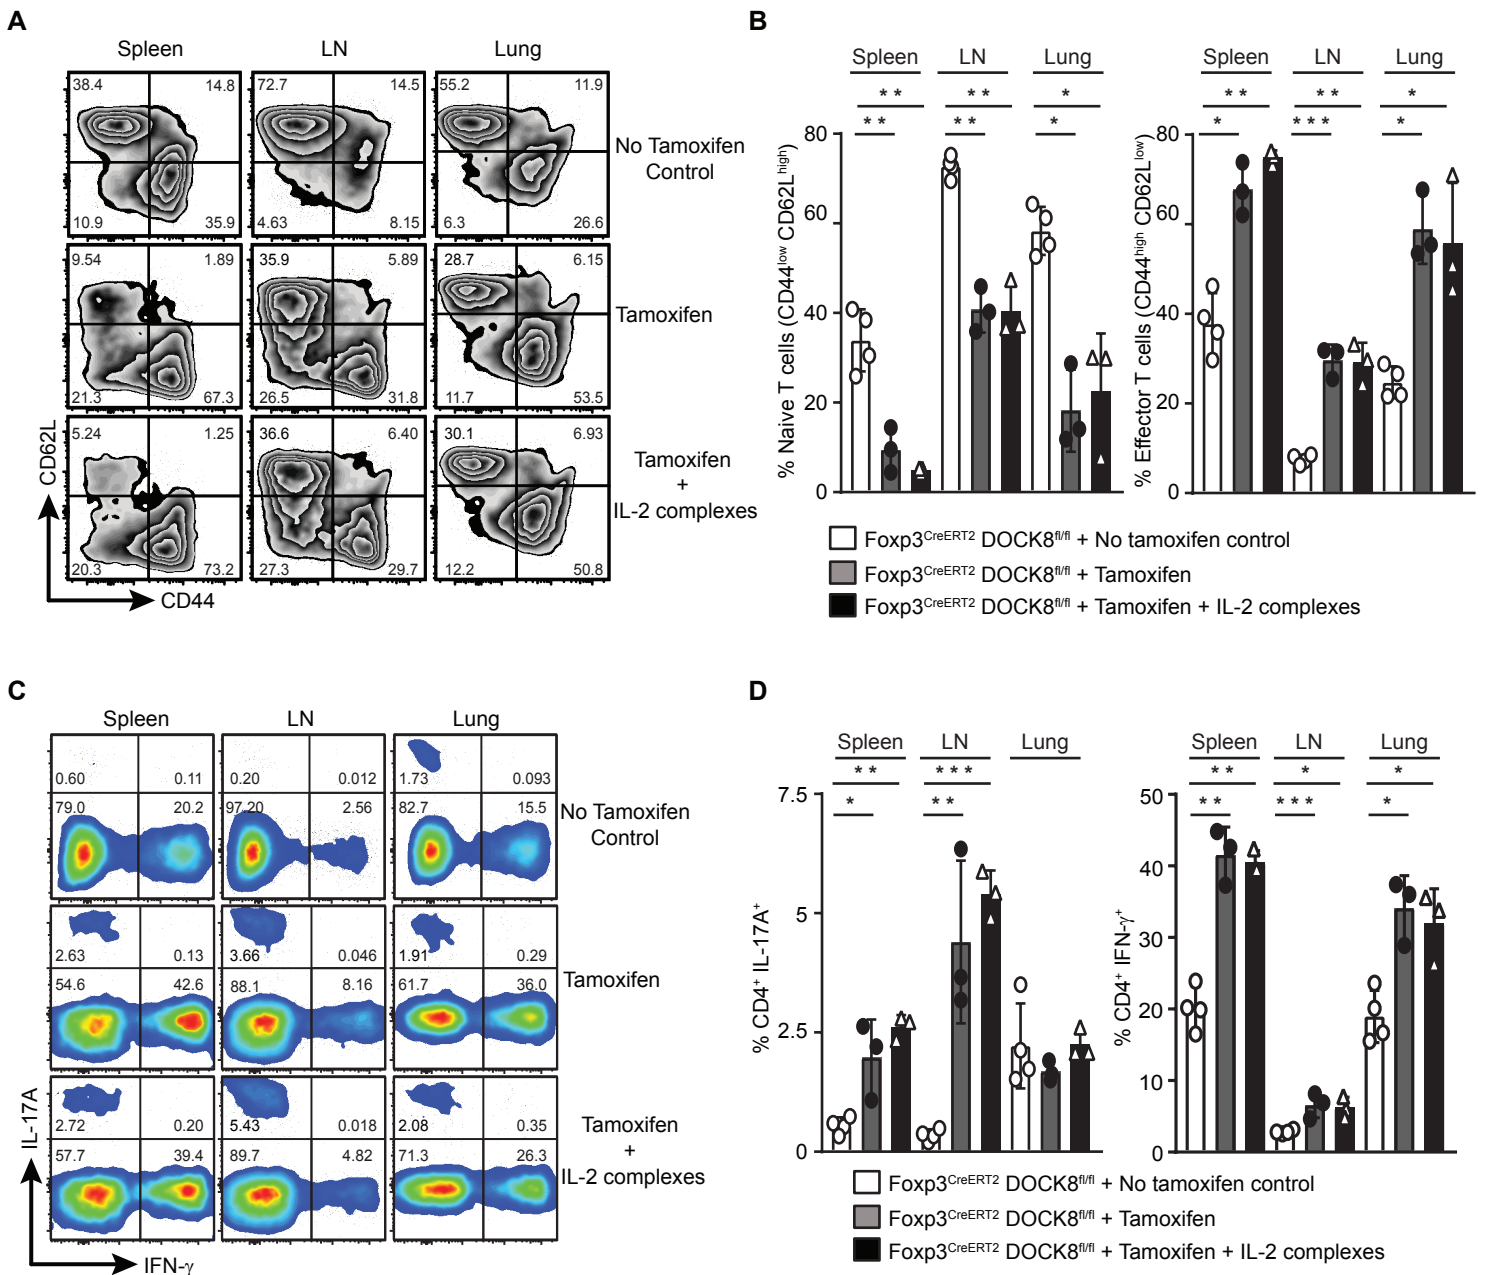

**Figure S4. IL-2 complexes treatment failed to rescue  $T_{reg}$  cell functions upon acute deletion of DOCK8 in  $T_{reg}$  cells ,related to Figure 5.**

(A and B) Flow cytometry analysis (A) and quantification (B) of naive/effector  $CD4^+$ T cells. (C and D) Flow cytometry analysis (C) and quantification (D) of intracellular IL-17A and IFN- $\gamma$  expression from indicated tissues analysed from control  $Foxp3^{CreERT2}$   $DOCK8^{fl/fl}$  mice (n = 4) and  $Foxp3^{CreERT2}$   $DOCK8^{fl/fl}$  mice injected either with tamoxifen (n = 3) or tamoxifen along with IL-2 complexes (n = 3). The data are representative of two independent experiments with similar results. The data shown are the mean  $\pm$  SD. Statistics were performed with Prism software by using t test\* P < 0.05, \*\* P < 0.01, \*\*\* P < 0.001.
